# Supplementary material
Source: Copernicus journal article supplement (doi:10.5194/egusphere-2026-1199)
Supplement: Supplementary file [file egusphere-2026-1199-AC2-supplement.pdf]

## Responses to reviewers' comments for EGUSPHERE-2026-1199

### Global vegetation responses to wet and dry soil moisture extremes

#### RC2:

This study uses NDVI anomalies as a proxy for vegetation response to wet and dry soil moisture extremes and uses random forest feature importance to relate anomalies to various drivers. I agree with the authors that comparing the response of vegetation to wet and dry extremes is necessary and important. The results reiterate previous studies which show that wet extremes generate a more heterogeneous response than do dry extremes (and often increase, rather than decrease, NDVI). The results also highlight the complex factors that influence NDVI response to both wet and dry extremes. My detailed comments are below:

#### Reply:

We thank the reviewer for the constructive comments and for recognizing the importance of comparing vegetation responses to wet and dry soil moisture extremes. We appreciate the positive assessment of the main findings, particularly regarding the heterogeneous nature of vegetation responses to wet extremes and the complex factors influencing these responses. Detailed responses to each comment are provided below, marked in blue.

#### Methods:

1. Line 71: Is 0-100cm of soil thickness the best choice for both dry and wet extremes? I could imagine that the surface soil moisture might be more relevant for wet extremes in particular.

#### Reply:

We thank the reviewer for this important comment. We aim to analyse vegetation responses to root-zone soil moisture, as vegetation functioning is generally more closely linked to water within the rooting zone than to near-surface soil moisture alone. This also applies for wet extremes. While we agree with the reviewer that surface soil moisture may reveal more wet extremes, we focus on deeper soil moisture in order to detect wet extremes where waterlogging can potentially affect most plant roots rather than only shallow roots. Due to the lack of accurate global rooting-depth information, we used soil moisture integrated over the upper 1 m as a commonly applied proxy for root-zone soil moisture (e.g., Guo et al., 2026). Previous studies have also shown that soil layers below the surface layer are of most relevance for vegetation productivity (Li et al., 2021), and estimated rooting depths across much of the globe typically extend beyond the uppermost soil layers (Stocker et al., 2023). We also added this explanation in the manuscript lines 100-103.

#### Lines 100-103:

*"We used the thickness-weighted average soil moisture of the top three layers (0-100 cm) as a proxy for root-zone soil moisture because vegetation responses are more strongly associated with sub-surface than near-surface soil moisture (Li et al., 2021), and rooting depths commonly exceed the uppermost soil layers across much of the globe (Stocker et al., 2023)."*

## References:

Guo, R., Wu, X., Wang, P. et al. Increased spread of global flash droughts threatens vegetation productivity resilience. *Nat Commun* 17, 4050 (2026). <https://doi.org/10.1038/s41467-026-70417-z>

Li, W., Migliavacca, M., Forkel, M., Walther, S., Reichstein, M., & Orth, R. (2021). Revisiting global vegetation controls using multi-layer soil moisture. *Geophysical Research Letters*, 48, e2021GL092856. <https://doi.org/10.1029/2021GL092856>

Stocker, B.D., Tumber-Dávila, S.J., Konings, A.G. et al. Global patterns of water storage in the rooting zones of vegetation. *Nat. Geosci.* 16, 250–256 (2023). <https://doi.org/10.1038/s41561-023-01125-2>

2. Line 84: Did you disregard events shorter than 5 days because of the 16-day NDVI resolution? If so, this reasoning (and its implications) is worth stating explicitly, since ideally shorter events could also be examined (particularly wet extremes). However, this 5 day threshold may still be too short given that you use 16-day NDVI and interpolate by repeating the same value for each day (Line 90). I would recommend further discussion of the implications and limitations of this resolution choice.

## Reply:

The exclusion of events shorter than 5 days was not determined by the temporal resolution of the NDVI dataset, but was introduced to reduce the influence of very short soil moisture fluctuations that are less likely to induce measurable vegetation responses. For example, vegetation impacts of excess soil moisture, such as waterlogging stress, generally require sustained anomalous conditions rather than short-lived fluctuations. We have clarified this in the revised manuscript (lines 120-123).

## Lines 120-123:

*“Events shorter than 5 days were excluded to reduce the influence of transient soil moisture fluctuations that are less likely to induce measurable vegetation responses, particularly for processes such as waterlogging stress that require sustained anomalous conditions.”*

We also acknowledge that the temporal interpolation of NDVI to daily resolution may limit the representation of rapidly evolving vegetation dynamics, particularly for short-duration extremes. We therefore clarified this limitation in the revised manuscript (lines 517-525).

## Lines 517-525:

*“In addition, the NDVI data used in this study are based on 16-day composite products that were temporally interpolated to daily resolution to align with daily soil moisture extremes. This interpolation may smooth short-term vegetation dynamics and introduce uncertainties in the timing and magnitude of rapid responses. As a result, fine-scale variability in vegetation responses may be dampened, and the exact alignment between NDVI and extreme events*

*should be interpreted with a degree of caution. Future work could benefit from higher-temporal-resolution vegetation products to better capture vegetation responses during hydrological extremes, although such products would also likely require careful filtering and smoothing to mitigate day-to-day noise associated with cloud contamination and atmospheric effects.”*

3. The RF description (Section 2.4) would benefit from several clarifications:

(1) Describe/define concurvity and its relevance (first mentioned in Line 142)

Reply:

We clarified the benefit of applying concurvity in the revised manuscript lines 199-202. In our study, concurvity is used as a measure of collinearity among predictors, quantifying the extent to which one predictor can be explained by all other predictors (explained in lines 198-199).

Lines 199-202

*“In contrast to correlation measures, concurvity can additionally capture non-linear dependencies among predictors, which is particularly relevant for environmental variables with potentially complex relationships.”*

Lines 198-199:

*“..., where concurvity (approximated using second-degree polynomial functions) measures the extent to which a predictor can be explained by all other predictors (Jiang et al, 2024).”*

(2) Write ‘out of bag’ score the first time the acronym OOB is used

Reply:

We explicitly wrote “out-of-bag (OOB)” when the acronym is first introduced (line 196).

(3) How did you treat the wet vs dry extremes? Did you repeat the entire training/prediction process twice, once for dry extremes and once for wet extremes? (Line 152)

Reply:

Wet and dry extremes were analysed separately throughout the Random Forest attribution framework. Specifically, the entire predictor selection, model training, and attribution procedure was performed independently for dry and wet extremes. We clarified this explicitly in the revised manuscript (line 211).

Line 211:

*“We applied the algorithm to all identified wet or dry extremes **separately** in a climate reference region defined by the Intergovernmental Panel on Climate Change (IPCC) (Iturbide et al., 2020).”*

(4) You say you only considered negative NDVI anomalies? (Line 155) Doesn't this eliminate the possibility of detecting wet or dry extremes that cause an increase in NDVI relative to expectation? (Such as what you say in Line 181 about greening during wet extremes?)

Reply:

We thank the reviewer for this important comment. We take both perspectives on any vs. only negative greenness anomalies in our study. While the analysis of the vegetation greenness response to wet and dry extremes in Figure 2 considers both increased and decreased greenness responses, our attribution analysis focused specifically on negative NDVI anomalies during hydrological extremes. This is in order to isolate events where vegetation functioning was adversely affected. We agree that wet or dry extremes can also coincide with positive NDVI anomalies, for example, when additional water availability enhances vegetation greenness. However, combining positive and negative vegetation responses within the same attribution framework would mix fundamentally different ecological processes and could obscure the interpretation of predictor effects. For instance, greater wet-extreme severity may promote greening in some extremes where vegetation benefits from more water (e.g., in dry regions), while causing vegetation stress and reduced greenness in other extremes (e.g., through waterlogging in wet regions). We therefore focused the attribution analysis on negative NDVI anomalies to specifically investigate the factors associated with vegetation stress responses during hydrological extremes. We clarified this in the revised manuscript, lines 216-218.

Lines 216-218:

*“This was done to specifically isolate vegetation stress responses, as combining positive and negative NDVI anomalies would mix fundamentally different ecological processes and complicate the interpretation of predictor effects.”*

And the attribution results for considering extremes with both positive and negative NDVI responses are shown in supplementary Figure S10-11 for comparison.

Results:

4. Figure 1. Would the number of events be proportional to the timeseries length, if events are chosen based on percentile thresholds? Does this mean that the different number of events per IPCC area is due to different numbers of pixels in each region or due to the number of events that could not be detected due to poor quality NDVI data?

Reply:

Since hydrological extremes were identified using percentile-based thresholds, the number of detected events is generally determined by the length of the available soil moisture time series (which in this study covers the period 2000-2023) and by the variability of the soil moisture time series (e.g., many short extreme events or fewer long extreme events). Furthermore, events are removed for which not sufficient reliable NDVI data was available.

Figure 1, however, presents results at the grid-cell level rather than aggregated statistics for each IPCC region; the IPCC boundaries are shown mainly to facilitate comparison with the regional attribution analyses.

To clarify this point, we added the following text to the Results section, lines 239-241 and lines 243-244.

Lines 239-241:

*“Spatial differences in the number of detected events are influenced by the variability of the soil moisture time series (e.g., many short extreme events or fewer long extreme events).”*

Lines 243-244:

*“Consequently, spatial differences in the number of retained events also reflect regional differences in NDVI data availability.”*

5. Additionally, you mention in Line 173 that “the most common reason for excluding an event was insufficient NDVI data availability.” Did you see that wet extremes were associated with reduced NDVI data quality to a greater degree than dry extremes?

Reply:

The spatial patterns of NDVI data availability were generally similar for wet and dry extremes (Figure S8), suggesting no systematic reduction in NDVI data quality specifically associated with wet extremes spatially. However, the final number of events retained for the attribution analysis differed between wet and dry extremes across regions. This difference mainly reflects differences in the occurrence frequency of the detected extremes and the event filtering criteria applied in the study. Specifically, for each event, we required sufficient NDVI data availability before, during, and after the extreme peak, with at least one-third of the expected observations available in each period. The same quality-control criteria were applied consistently to both wet and dry extremes to ensure comparable reliability of the analysed events. The final numbers of retained events and selected RF models for each IPCC region are now additionally shown in Figure S4.



Caption of Figure 2, lines 284-286:

*“Spatial representativeness may vary across regions due to differences in data availability and event filtering; corresponding data availability flags are shown in Figure S8.”*

Line 253-255:

*“The spatial representativeness of these patterns may vary across regions because events with insufficient NDVI data availability were excluded from the analysis (Figure S8).”*

7. You provide the OOB score and concurvity information in Figure S5, but the RF model performance is very important for interpreting your results. Could you report on the performance more explicitly in the main text? I would like to know how the RF performance varies across IPCC regions and across the wet vs dry extreme models and how this impacts your results.

We thank the reviewer for this important comment. We agree that the RF model performance is essential for interpreting the attribution results. We therefore additionally clarified that RF performance varied across IPCC regions and between wet and dry extreme analyses, reflecting differences in the predictability of vegetation responses and the extent to which the selected predictors explain regional variability in lines 312-326.

Line 343-358:

*“The robustness and interpretability of these regional attribution patterns depend on the explanatory performance of the RF models and the degree of concurvity among the selected predictors (Figure S5). The average OOB scores of the selected RF models across all regions ranged from 0.22 to 0.62 (SD = 0.11), while the average concurvity values ranged from 0.23 to 0.66 (SD = 0.11). RF model performance varied across IPCC regions and between wet and dry extremes. Lower OOB scores and higher concurvity values were generally found in regions with relatively few retained events, such as Eastern Central Asia (ECA) for wet extremes and Russian-Arctic (RAR) for dry extremes (Figure S4). Lower explanatory power was also observed in regions where vegetation responses to hydrological extremes were comparatively weak or spatially heterogeneous, such as Western Central Africa (WAF) for wet extremes and Central Africa (CAF) for dry extremes (Figure 2). In contrast, regions with stronger and more spatially coherent NDVI anomalies during extremes generally showed higher OOB scores and lower concurvity among predictors. Overall, OOB scores were slightly lower for wet extremes than for dry extremes, consistent with the more heterogeneous vegetation responses observed during wet extremes. Nevertheless, the RF models generally retained moderate-to-high explanatory power and low-to-moderate concurvity across most regions, indicating that the identified attribution patterns are robust and that the selected predictors capture meaningful variability in vegetation responses to hydrological extremes.”*

8. Paragraph starting at Line 195: It would be helpful to clarify here whether the results refer to wet or dry extremes.

We added which extremes the texts refer to.

Lines 273-277:

*“While Figure 2a and 2c provide an overview of mean vegetation responses, the low consistency of NDVI anomalies across individual events in regions such as eastern North America (ENA), central Africa (CAF) **for wet extremes** (Figure 2b) and boreal forests in Eurasia **for dry extremes** (NEU, EEU, WSB) (Figure 2d) highlights that even under similar environmental conditions, vegetation responses to hydrological extremes can differ substantially.”*

9. Figure 2. The map is great, but because you are showing the average NDVI anomalies, the information in Figure S6 (with the distribution of the anomalies) is possibly more relevant for the main text, especially because so many of the IPCC regions have both negative and positive anomalies.

We thank the reviewer for this valuable suggestion. Figure 2 (map) and Figure S7 (boxplot) were designed to highlight complementary aspects of vegetation responses to hydrological extremes. Figure 2 primarily emphasizes the spatial patterns of mean NDVI anomalies and the spatial distribution of events associated with negative NDVI anomalies, thereby providing a global overview of where vegetation greening or browning responses are more prevalent. In particular, panels (b) and (d) explicitly show that both positive and negative NDVI anomalies can occur within the same regions and even within nearby grid cells. In contrast, Figure S7 focuses on the statistical distribution of NDVI anomalies within each IPCC region and is therefore intended to complement the spatial information shown in Figure 2 rather than replace it. We nevertheless agree that Figure S7 provides important additional context for interpreting the regional heterogeneity of vegetation responses and now refer to it more explicitly in the main text (lines 277-278).

Lines 277-278:

*“The regional distributions of NDVI anomalies further illustrate this heterogeneity and the coexistence of positive and negative responses within most IPCC regions (Figure S7).”*

10. Line 208-210: You describe the importance of antecedent conditions for wet extremes very definitively here, but in the abstract the takeaway seems to be that all of the factors you looked at are important. It would be helpful to clarify the main paper takeaways (for example if there are consistently important drivers or differences in drivers between the wet vs dry extremes) and make this message consistent between the text and the abstract. In general, it is a little bit hard to follow in the text which factors you describe as important for controlling the negative vs positive anomaly attribution for the wet vs dry extremes.

We thank the reviewer for this important comment. We revised the manuscript to clarify the hierarchy of influential factors across regions as a summary at the end of Result section 3.3 (lines 311-313). In particular, we now emphasize more explicitly that pre-extreme vegetation conditions and extreme characteristics are generally the dominant predictor categories, whereas environmental background variables usually play a secondary but regionally important role, especially for negative vegetation responses during wet extremes. We also

revised the Abstract (lines 20-24) to better distinguish the dominant controls for wet versus dry extremes and to ensure consistency with the regional attribution results presented in Figure 3.

Lines 311-313:

*“Overall, pre-extreme vegetation conditions and extreme characteristics constitute the two most influential categories across most regions, while environmental background generally plays a secondary but regionally important role, particularly for negative vegetation responses during wet extremes.”*

Abstract, Lines 20-24:

*“Negative vegetation responses during wet extremes are most consistently associated with pre-extreme vegetation conditions, while environmental background variables such as climate (e.g., long-term mean air temperature, aridity) and topographic variability show comparatively stronger relevance than for dry extremes. Extreme characteristics also contribute substantially, though with greater regional variability than for dry extremes.”*

11. Figure 4: It would be helpful to see how far ahead the ‘leading variable’ is.

We thank the reviewer for this helpful suggestion. To better illustrate the relative dominance of the leading predictor within each category, we added an indicator in Figure 4 showing regions where the most relevant variable was selected substantially more frequently than the second-ranked variable. Specifically, an asterisk next to the region label indicates that the most relevant variable was selected at least 50% more frequently than the second most relevant variable within the respective category. This addition helps distinguish regions with a clear dominant predictor from those where multiple variables show similarly high relevance.

New Figure 4:

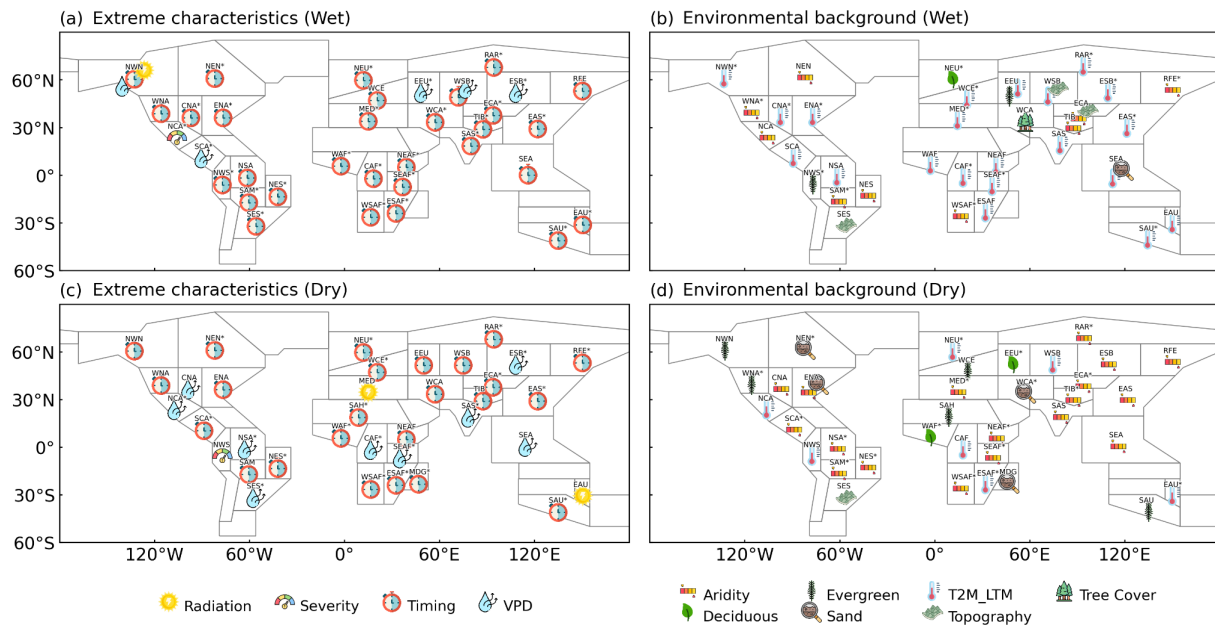

Figure 4: Most relevant variables for negative vegetation responses during wet (a,b) and dry (c,d) extremes in terms of extreme characteristics and environmental background. Multiple variables are shown in case their relevance is the same according to the ranking. **The asterisk next to each region label indicates that the most relevant variable was selected at least 50% more frequently than the second most relevant variable within that category.** Note that the attribution analysis is based only on extremes with negative NDVI anomalies.

12. Section 3.4 (Line 246ish): When you look at the two regions with the most negative NDVI anomalies during wet and dry extremes, is it fair to look at just the negative NDVI response for wet extremes, when you found such a heterogeneous response to wet extremes, even for the sign of the NDVI anomaly? It would be worth mentioning this.

We agree that vegetation responses to wet extremes are substantially more heterogeneous than responses to dry extremes, including differences in the sign of NDVI anomalies. In Result 3.4, we specifically focused on negative NDVI anomalies because the objective was to investigate vegetation stress responses associated with hydrological extremes. The selected regions with the strongest negative NDVI anomalies during wet extremes were used as representative examples of such stress responses and also exhibited relatively high proportions of wet extremes associated with negative NDVI anomalies (e.g., 53% in Eastern Europe (EEU) and 46% in Northern Europe (NEU)). We nevertheless clarified in the revised manuscript that these regions still contain substantial event-to-event variability and do not represent uniformly negative vegetation responses to wet extremes (lines 365-368).

Lines 365-368:

*“Although vegetation responses to wet extremes are regionally heterogeneous and can include both positive and negative NDVI anomalies, EEU and NEU also exhibited relatively high proportions of wet extremes associated with vegetation browning (53% in EEU and 46% in NEU), supporting their selection as representative case-study regions.”*

13. Small comments:

Line 54: You use several different phrases to refer to antecedent conditions. Consider picking one term.

We kept using “pre-extreme vegetation condition” now in the revised manuscript.

Line 61: I wouldn’t necessarily describe this RF approach as “new,” although it does seem effective.

Revised to “effective” in line 88.

Line 117: Which version of GLEAM did you use?

GLEAM 4.1a (now added in line 166)

Line 166:

**“..., and evapotranspiration from the Global Land Evaporation Amsterdam Model (GLEAM 4.1a).”**

Grammar/punctuation errors:

Line 35, "...stomatal closure, decrease..."

Line 40, "oxygen deficiency add nutrient uptake"

All revised.

Lines 49-50:

*"Dry extremes affect vegetation by inducing water stress, leading to stomatal closure (Knipfer et al. 2020) and decreased carbon uptake."*

Lines 54-56:

*"Excessive soil moisture can directly impair vegetation through waterlogging, which can increase susceptibility to pathogens or fungal infections, cause root oxygen deficiency, and limit nutrient uptake (Li et al., 2019)."*
